# Supplementary material
Source: MDPI journal article supplement (https://www.mdpi.com/2073-4441/13/19/2724)
Supplement: s1 [file s1]

**Table S1.** Statistics of the groundwater quality parameters for each district in Sri Lanka.

| ID   | District     | NO <sub>3</sub> <sup>-</sup> |      | Hardness |      | Fluoride |      | As   |      | Cd   |      | Fe   |      | Mn   |      | Cu   |      | Cr   |      | Pb   |      | Al   |      |
|------|--------------|------------------------------|------|----------|------|----------|------|------|------|------|------|------|------|------|------|------|------|------|------|------|------|------|------|
|      |              | Max                          | Ave  | Max      | Ave  | Max      | Ave  | Max  | Ave  | Max  | Ave  | Max  | Ave  | Max  | Ave  | Max  | Ave  | Max  | Ave  | Max  | Ave  | Max  | Ave  |
|      |              | mg/L                         | mg/L | mg/L     | mg/L | mg/L     | mg/L | µg/L |
| SL1  | Ampara       | 33                           | 3    | 362      | 135  | 5.8      | 0.8  | 2    | 1    | 0.1  | 0.01 | 546  | 38   | 6068 | 192  | 5    | 1    | 14   | 1    | 1.2  | 0.1  | 765  | 48   |
| SL2  | Anuradhapura | 131                          | 6    | 1373     | 283  | 7        | 1.1  | 3    | 0    | 0.2  | 0.01 | 82   | 7    | 1532 | 37   | 246  | 3    | 2    | 0    | 4.6  | 0.1  | 135  | 5    |
| SL3  | Badulla      | 47                           | 4    | 495      | 140  | 2.3      | 0.6  | 1    | 0    | 0.1  | 0.01 | 62   | 8    | 858  | 68   | 431  | 10   | 2    | 0    | 0.9  | 0.1  | 117  | 7    |
| SL4  | Batticaloa   | 44                           | 8    | 319      | 163  | 0.7      | 0.2  | 14   | 3    | 0.2  | 0.01 | 75   | 11   | 94   | 8    | 2    | 1    | 1    | 0    | 0.1  | 0    | 252  | 19   |
| SL5  | Colombo      | 37                           | 13   | 132      | 31   | 0.1      | 0    | 0    | 0    | 0    | 0    | 8    | 1    | 394  | 61   | 2    | 0    | 0    | 0    | 3.3  | 0.3  | 567  | 47   |
| SL6  | Galle        | 37                           | 8    | 232      | 34   | 5.8      | 0.1  | 0    | 0    | 0.2  | 0.01 | 546  | 12   | 366  | 39   | 7    | 1    | 6    | 0    | 288  | 0.5  | 815  | 43   |
| SL7  | Gampaha      | 58                           | 18   | 110      | 20   | 0.1      | 0    | 0    | 0    | 0    | 0.01 | 36   | 3    | 285  | 45   | 1    | 0    | 0    | 0    | 0.7  | 0.2  | 151  | 34   |
| SL8  | Hambantota   | 128                          | 2    | 1734     | 293  | 2.3      | 0.6  | 3    | 1    | 0.1  | 0.01 | 242  | 10   | 2346 | 144  | 12   | 1    | 2    | 0    | 0.3  | 0    | 604  | 10   |
| SL9  | Jaffna       | 110                          | 19   | 1080     | 354  | 1.3      | 0.2  | 6    | 2    | 0.1  | 0.02 | 51   | 6    | 216  | 20   | 11   | 3    | 2    | 0    | 0    | 0    | 10   | 0    |
| SL10 | Kalutara     | 19                           | 7    | 317      | 38   | 0.7      | 0.1  | 3    | 0    | 0    | 0    | 73   | 4    | 148  | 31   | 8    | 1    | 1    | 0    | 1    | 0.1  | 434  | 33   |
| SL11 | Kandy        | 18                           | 5    | 400      | 144  | 0.4      | 0.2  | 0    | 0    | 0    | 0    | 271  | 14   | 2018 | 170  | 1    | 0    | 0    | 0    | 0    | 0    | 18   | 3    |
| SL12 | Kegalle      | 35                           | 5    | 166      | 69   | 0.3      | 0.1  | 0    | 0    | 0    | 0    | 85   | 8    | 349  | 38   | 1    | 0    | 3    | 0    | 0    | 0    | 84   | 7    |
| SL13 | Kilinochchi  | 55                           | 13   | 615      | 236  | 1.3      | 0.2  | 2    | 1    | 0.1  | 0.01 | 351  | 17   | 489  | 58   | 2    | 1    | 2    | 1    | 0.6  | 0.1  | 966  | 43   |
| SL14 | Kurunegala   | 22                           | 2    | 423      | 169  | 5        | 0.7  | 1    | 0    | 0    | 0    | 388  | 17   | 2479 | 219  | 1    | 0    | 3    | 0    | 0.1  | 0    | 559  | 19   |
| SL15 | Mannar       | 135                          | 15   | 647      | 280  | 1.2      | 0.4  | 66   | 7    | 0.1  | 0.02 | 659  | 42   | 353  | 56   | 7    | 4    | 3    | 1    | 0.2  | 0    | 1364 | 46   |
| SL16 | Matale       | 53                           | 8    | 494      | 120  | 2.6      | 0.4  | 2    | 0    | 0.2  | 0.01 | 119  | 10   | 1058 | 58   | 37   | 2    | 2    | 0    | 1.2  | 0.1  | 89   | 5    |
| SL17 | Matara       | 53                           | 9    | 341      | 80   | 0.6      | 0.1  | 4    | 0    | 0.1  | 0.01 | 604  | 16   | 1796 | 80   | 114  | 2    | 1    | 0    | 2.2  | 0.1  | 1233 | 43   |
| SL18 | Moneragala   | 82                           | 4    | 891      | 244  | 6.8      | 1.4  | 2    | 0    | 0.5  | 0.01 | 614  | 17   | 803  | 46   | 166  | 4    | 6    | 0    | 4.3  | 0.1  | 1457 | 25   |
| SL19 | Mullaitivu   | 51                           | 12   | 619      | 172  | 0.4      | 0.1  | 13   | 3    | 0.3  | 0.02 | 180  | 27   | 484  | 69   | 443  | 21   | 2    | 1    | 3.9  | 0.3  | 284  | 39   |
| SL20 | Nuwara Eliya | 10                           | 5    | 149      | 36   | 0.1      | 0.04 | 0    | 0    | 0    | 0    | 828  | 283  | 601  | 96   | 3    | 2    | 0    | 0    | 3    | 0.5  | 275  | 58   |
| SL21 | Polonnaruwa  | 19                           | 1    | 980      | 231  | 3.4      | 0.8  | 3    | 0    | 0    | 0.01 | 154  | 10   | 9772 | 440  | 56   | 2    | 1    | 0    | 0.1  | 0    | 57   | 3    |
| SL22 | Puttalam     | 366                          | 42   | 749      | 329  | 2.2      | 0.3  | 15   | 4    | 0    | 0    | 291  | 51   | 79   | 19   | 5    | 2    | 2    | 1    | 3.6  | 0.3  | 86   | 11   |
| SL23 | Ratnapura    | 28                           | 11   | 174      | 63   | 0.2      | 0.1  | 0    | 0    | 0.1  | 0    | 25   | 2    | 385  | 69   | 6    | 1    | 4    | 1    | 2.6  | 0.2  | 297  | 17   |
| SL24 | Trincomalee  | 79                           | 7    | 581      | 254  | 2.4      | 0.8  | 9    | 1    | 0    | 0    | 38   | 4    | 219  | 15   | 2    | 1    | 0    | 0    | 0.1  | 0    | 25   | 3    |
| SL25 | Vavuniya     | 102                          | 27   | 665      | 333  | 3.1      | 0.8  | 2    | 1    | 0.1  | 0.01 | 73   | 5    | 599  | 34   | 110  | 7    | 6    | 1    | 1.3  | 0.3  | 40   | 4    |

Note: max, maximum concentration; ave, average concentration; hardness, CaCO<sub>3</sub> concentration.

**Table S2.** Characteristics of the 25 administrative districts in Sri Lanka.

| District     | Area            | Elevation | Cropland | Forest | Impervious surface | Metamorphic rocks | Acid plutonic rocks | Unconsolidated sediments | Carbonate sedimentary rocks | Precipitation | Air temperature |
|--------------|-----------------|-----------|----------|--------|--------------------|-------------------|---------------------|--------------------------|-----------------------------|---------------|-----------------|
|              | km <sup>2</sup> | m         | %        | %      | %                  | %                 | %                   | %                        | %                           | mm            | °C              |
| Ampara       | 6970            | 66        | 37.6     | 45.3   | 0.6                | 69.0              | 28.2                | 1.9                      | 0.0                         | 1738          | 27.4            |
| Anuradhapura | 11074           | 102       | 39.3     | 58.1   | 0.1                | 79.6              | 13.1                | 2.0                      | 0.3                         | 1402          | 27.3            |
| Badulla      | 4308            | 624       | 11.3     | 74.0   | 0.1                | 92.3              | 1.4                 | 0.0                      | 2.9                         | 1899          | 24.1            |
| Batticaloa   | 3909            | 26        | 57.2     | 22.0   | 1.0                | 67.7              | 7.4                 | 20.7                     | 0.0                         | 1703          | 27.9            |
| Colombo      | 1058            | 36        | 35.6     | 43.1   | 12.8               | 95.9              | 0.0                 | 0.0                      | 0.0                         | 3197          | 27.2            |
| Galle        | 2534            | 71        | 16.0     | 78.7   | 0.4                | 91.0              | 0.5                 | 5.2                      | 2.1                         | 3343          | 26.5            |
| Gampaha      | 2215            | 35        | 34.4     | 54.1   | 3.9                | 94.1              | 1.1                 | 3.7                      | 0.3                         | 2580          | 27.2            |
| Hambantota   | 4023            | 47        | 40.3     | 48.9   | 0.6                | 78.8              | 13.4                | 6.1                      | 1.1                         | 1267          | 27.1            |
| Jaffna       | 1523            | 6         | 62.9     | 5.1    | 2.9                | 0.0               | 0.0                 | 57.7                     | 37.1                        | 1291          | 28.1            |
| Kalutara     | 2595            | 65        | 17.1     | 77.9   | 0.8                | 91.8              | 0.0                 | 3.1                      | 0.0                         | 3720          | 26.7            |
| Kandy        | 2981            | 656       | 4.7      | 86.2   | 0.3                | 86.2              | 4.5                 | 0.0                      | 1.8                         | 2370          | 23.8            |
| Kegalle      | 2576            | 269       | 2.7      | 94.6   | 0.1                | 83.1              | 8.4                 | 0.0                      | 0.0                         | 3415          | 25.8            |
| Kilinochchi  | 1975            | 13        | 59.3     | 23.9   | 1.8                | 0.0               | 8.5                 | 80.5                     | 10.8                        | 1300          | 28.0            |
| Kurunegala   | 7560            | 100       | 36.4     | 60.9   | 0.2                | 73.6              | 21.1                | 2.3                      | 0.4                         | 1704          | 27.2            |
| Mannar       | 3062            | 32        | 35.3     | 56.6   | 1.3                | 4.2               | 14.1                | 81.1                     | 0.6                         | 1140          | 27.6            |
| Matale       | 3191            | 343       | 17.0     | 78.3   | 0.1                | 77.6              | 2.5                 | 0.0                      | 9.1                         | 1862          | 25.8            |
| Matara       | 2011            | 153       | 13.1     | 83.0   | 0.4                | 95.7              | 0.0                 | 4.2                      | 0.0                         | 2722          | 26.1            |
| Moneragala   | 8662            | 164       | 20.9     | 71.5   | 0.1                | 75.8              | 21.1                | 0.6                      | 0.3                         | 1536          | 26.7            |
| Mullaitivu   | 3868            | 41        | 31.2     | 63.7   | 0.3                | 5.6               | 49.2                | 45.2                     | 0.0                         | 1394          | 27.6            |
| Nuwara Eliya | 2651            | 1286      | 3.4      | 78.8   | 0.1                | 92.4              | 0.0                 | 0.0                      | 1.0                         | 2476          | 20.0            |
| Polonnaruwa  | 5212            | 77        | 43.7     | 51.5   | 0.2                | 73.6              | 9.9                 | 4.8                      | 5.6                         | 1674          | 27.5            |
| Puttalam     | 5036            | 31        | 49.7     | 38.4   | 1.4                | 12.0              | 35.2                | 51.3                     | 0.5                         | 1281          | 27.5            |
| Ratnapura    | 5079            | 378       | 6.1      | 89.0   | 0.1                | 94.3              | 0.4                 | 0.0                      | 0.9                         | 3361          | 25.0            |
| Trincomalee  | 4105            | 31        | 46.2     | 44.5   | 0.6                | 70.1              | 10.4                | 12.5                     | 0.8                         | 1507          | 27.9            |
| Vavuniya     | 3075            | 78        | 28.0     | 70.4   | 0.0                | 55.8              | 39.0                | 5.0                      | 0.0                         | 1398          | 27.4            |

Note: the values of elevation, precipitation, and air temperature are the average.
